# Supplementary material for: Peptide-Based Capture of Chikungunya Virus E2 Protein Using Porous Silicon Biosensor
Source: MDPI journal article supplement (doi:10.3390/s21248248), 2021-12-10
Supplement: s1 [file s1]

## Supplementary Materials

# Peptide-Based Capture of Chikungunya Virus E2 Protein Using Porous Silicon Biosensor

Rabeb Layouni <sup>1</sup>, Tengfei Cao <sup>2</sup>, Matthew B. Coppock <sup>3</sup>, Paul E. Laibinis <sup>1,2</sup> and Sharon M. Weiss <sup>2,4,\*</sup>

<sup>1</sup> Department of Chemical & Biomolecular Engineering, Vanderbilt University, Nashville, TN 37235, USA; rabeb.layouni@vanderbilt.edu (R.L.); paul.e.laibinis@vanderbilt.edu (P.E.L.)

<sup>2</sup> Interdisciplinary Material Science Program, Vanderbilt University, Nashville, TN 37235, USA; tengfei.cao@vanderbilt.edu

<sup>3</sup> Human Research and Engineering Directorate, DEVCOM Army Research Laboratory, Adelphi, MD 20783, USA; matthew.b.coppock.civ@army.mil

<sup>4</sup> Department of Electrical and Computer Engineering, Vanderbilt University, Nashville, TN 37235, USA

\* Correspondence: sharon.weiss@vanderbilt.edu

Kratos PC Axima CFR V2.3.4: Mode Linear, Power: 120, P.Ext. @ 1500 (bin 63)

%Int. 44 mV[sum= 8854 mV] Profiles 1-200 Smooth Av 2 -Baseline 80

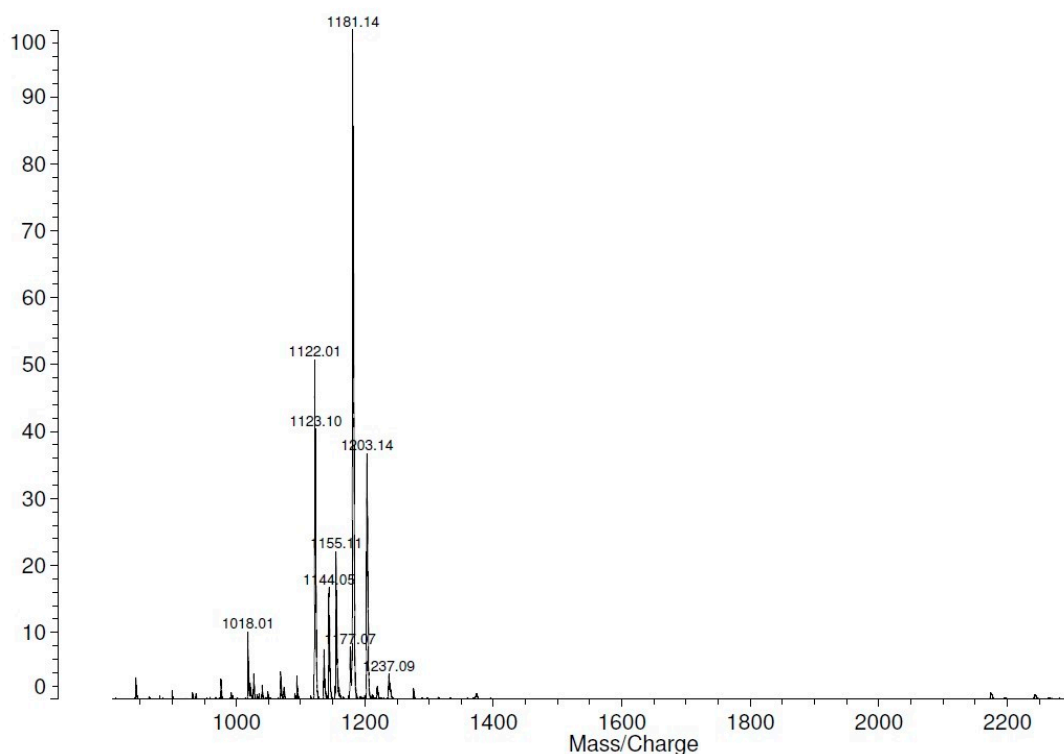

**Figure S1.** Mass spectrum of Lys(N<sub>3</sub>)-Cy(YWHWS). MALDI-TOF MS (m/z): calcd (M+H) 1181.3; found 1181.14.

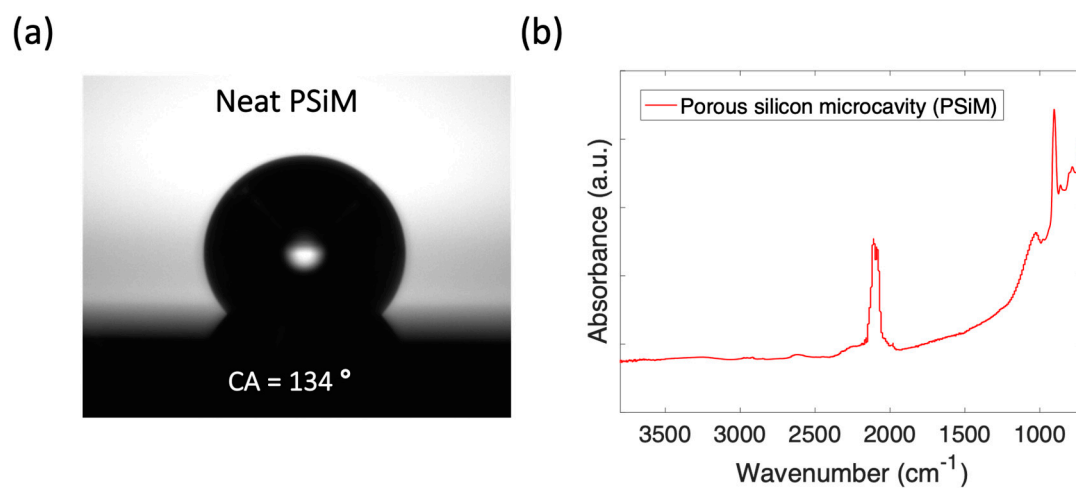

**Figure S2.** Neat porous silicon microcavity (PSiM) characterization. (a) Water contact angle measurement on freshly etched PSiM. The contact angle of  $\sim 134^\circ$  (avg =  $130^\circ \pm 6^\circ$ , N = 2) indicates a hydrophobic surface. (b) ATR-FTIR absorbance spectrum of freshly etched PSiM. The sharp peaks near  $2100\text{ cm}^{-1}$  are characteristic of silicon hydride (Si-H) bonds.
